# Supplementary material for: Development of Pilot-Scale CO2 Methanation Using Pellet-Type Catalysts for CO2 Recycling in Sewage Treatment Plants and Its Validation through Computational Fluid Dynamics (CFD) Modeling
Source: MDPI journal article supplement (doi:10.3390/catal11081005), 2021-08-20
Supplement: s1 [file s1]

## Supplementary Materials

Development of pilot-scale CO<sub>2</sub> methanation using pellet-type catalysts for CO<sub>2</sub> recycling in sewage treatment plants and its validation through Computational Fluid Dynamics (CFD) modeling

Jeong Yoon Ahn, Hey Suk Kim, Yeon Hee Ro, Jin Tae Kim, Woo Jin Chung,\* and Soon Woong Chang,\*

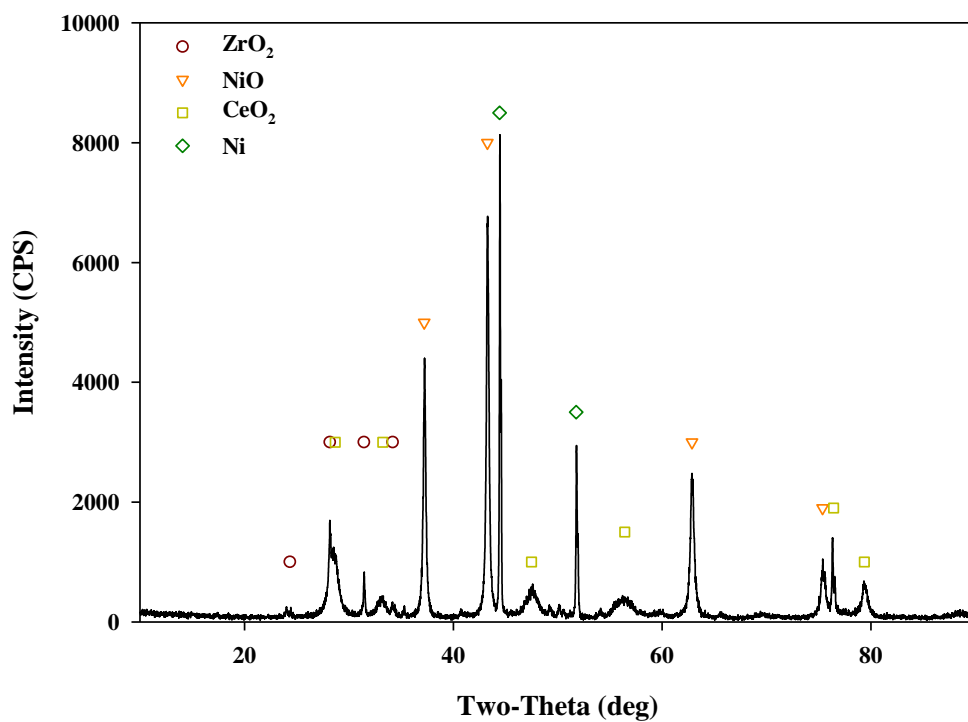

Figure S1. XRD patterns of catalyst.

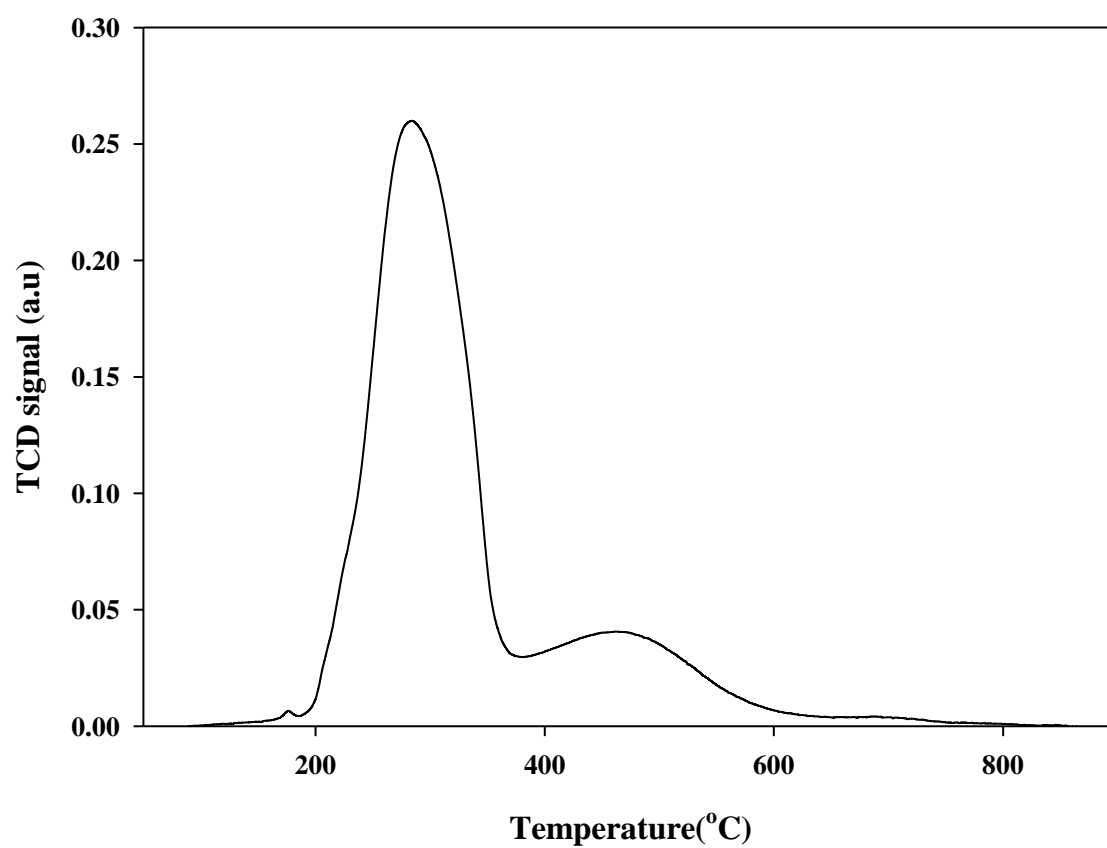

**Figure S2.** H<sub>2</sub>-TPR profile of Pellet catalyst.
